# Supplementary material
Source: publisher figshare collection journal article supplement (https://acs.figshare.com/ndownloader/files/21833181)
Supplement: Supplementary file 1 [file 21833181]

Support information

## **Light and Heat Triggering Modulation of the Electronic Performance of a Graphdiyne-based Thin Film Transistor**

*Yuan Li,<sup>†,‡</sup> Mingjia Zhang,<sup>‡,\*</sup> Xiuli Hu,<sup>‡</sup> Xinhui Fan,<sup>†</sup> Lingmin Yu,<sup>†,\*</sup> and Changshui Huang<sup>‡,§,\*</sup>*

<sup>†</sup>School of Material and Chemical Engineering, Xi'an Technological University, Xi'an 710021, P. R. China.

<sup>‡</sup>Qingdao Institute of Bioenergy and Bioprocess Technology, Chinese Academy of Sciences, Qingdao 266101, P. R. China.

<sup>§</sup>Center of Materials Science and Optoelectronics Engineering, University of Chinese Academy of Sciences, Beijing 100049, P. R. China.

### **Corresponding Author**

\*E-mail: huangcs@qibebt.ac.cn

\*E-mail: zhangmj@qibebt.ac.cn

\*E-mail: ylmyl@163.com

### **Contents:**

Figure S1-S4, Table1 EDS analysis of elements, atomic content and elemental distribution of GDY films.

Figure S5-S7 Electric field regulation field effect transistor performance under fixed irradiation wavelength and intensity.

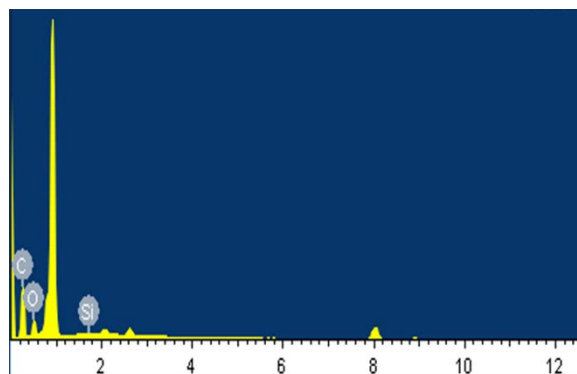

**Figure S1** EDS analysis of the content of each element of GDY film.

| element | Weight (percent) | atom (percent) |
|---------|------------------|----------------|
| C K     | 59.94            | 66.86          |
| O K     | 38.93            | 32.60          |
| Si K    | 1.13             | 0.54           |
| total   | 100.00           | 100.00         |

**Table S1** The proportion of elemental and atomic content of GDY film.

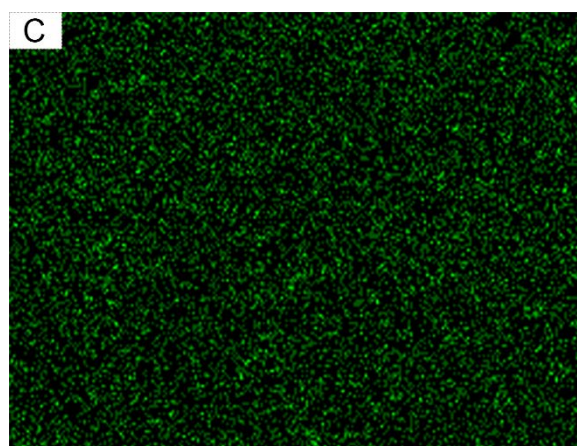

**Figure S2** C element mapping of GDY film.

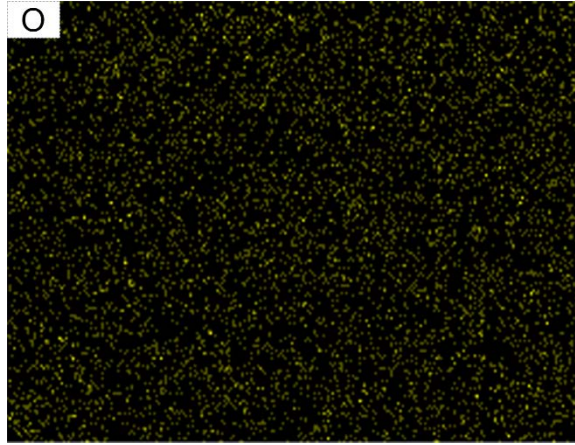

**Figure S3** O element mapping of GDY film.

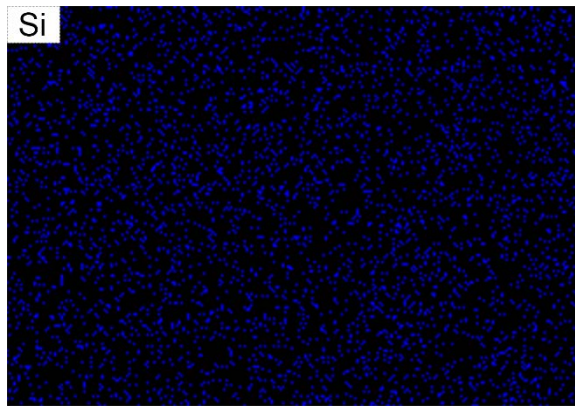

**Figure S4** Si element mapping of GDY film.

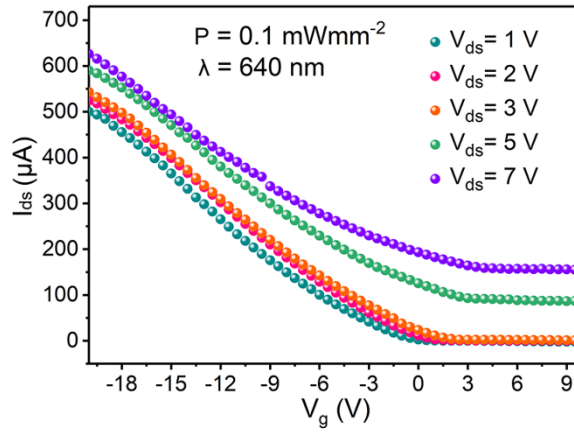

**Figure S5** Transfer characteristics of different  $V_{ds}$  under fixed wavelength (640 nm) and intensity illumination ( $0.1\text{mWmm}^{-2}$ ).

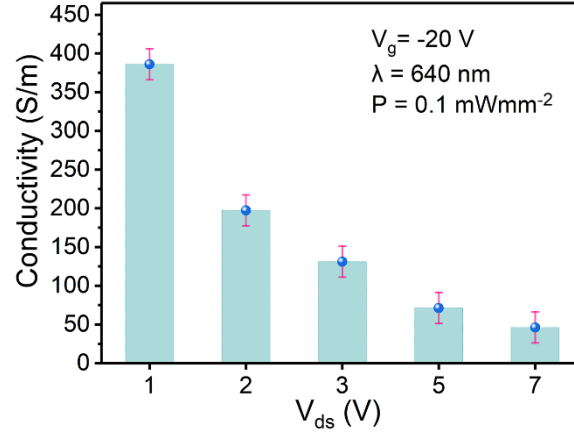

**Figure S6** Conductivity of different  $V_{ds}$  under fixed wavelength (640 nm) and intensity irradiation (0.1mWmm<sup>-2</sup>).

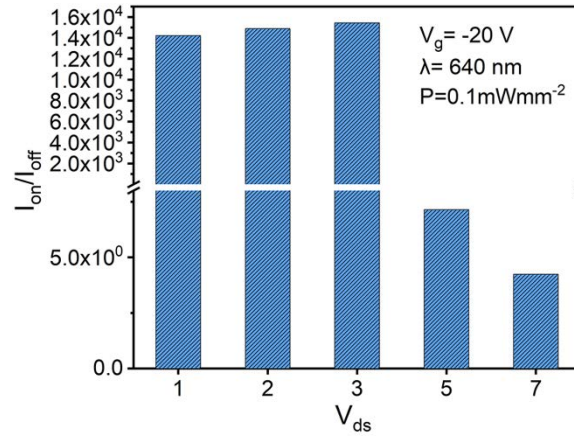

**Figure S7** The on/off ratio of different  $V_{ds}$  under fixed wavelength (640 nm) and intensity irradiation (0.1mWmm<sup>-2</sup>).
